# Supplementary material
Source: MDPI journal article supplement (https://www.mdpi.com/2076-3417/12/24/12505)
Supplement: s1 [file s1]

**Table S1.** Daily air pollutant concentrations correlation matrix for study period 1st April – 31th May 2020, Kanazawa city<sup>a</sup>

|                   | Flt | Pyr     | BaA   | Chr     | BbF     | BkF     | BaP     | BghiP   | IcdP    | Total PAHs | TSP     | SO <sub>2</sub> | NO <sub>2</sub> | PM <sub>2.5</sub> |
|-------------------|-----|---------|-------|---------|---------|---------|---------|---------|---------|------------|---------|-----------------|-----------------|-------------------|
| Flt               | 1   | 0.984** | 0.088 | 0.981** | 0.951** | 0.952** | 0.846** | 0.856** | 0.850** | 0.969**    | 0.584** | 0.453**         | 0.18            | 0.664**           |
| Pyr               |     | 1       | 0.179 | 0.978** | 0.948** | 0.966** | 0.901** | 0.892** | 0.882** | 0.981**    | 0.542** | 0.415**         | 0.222           | 0.670**           |
| BaA               |     |         | 1     | 0.177   | 0.257*  | 0.283*  | 0.380** | 0.341** | 0.309*  | 0.245      | -0.042  | -0.123          | 0.144           | 0.139             |
| Chr               |     |         |       | 1       | 0.978** | 0.978** | 0.904** | 0.903** | 0.899** | 0.987**    | 0.626** | 0.468**         | 0.214           | 0.720**           |
| BbF               |     |         |       |         | 1       | 0.987** | 0.917** | 0.942** | 0.935** | 0.986**    | 0.604** | 0.415**         | 0.22            | 0.715**           |
| BkF               |     |         |       |         |         | 1       | 0.945** | 0.958** | 0.947** | 0.995**    | 0.557** | 0.370**         | 0.222           | 0.696**           |
| BaP               |     |         |       |         |         |         | 1       | 0.953** | 0.949** | 0.941**    | 0.486** | 0.296*          | 0.221           | 0.674**           |
| BghiP             |     |         |       |         |         |         |         | 1       | 0.989** | 0.952**    | 0.476** | 0.309*          | 0.278*          | 0.640**           |
| IcdP              |     |         |       |         |         |         |         |         | 1       | 0.945**    | 0.466** | 0.312*          | 0.260*          | 0.640**           |
| Total PAHs        |     |         |       |         |         |         |         |         |         | 1          | 0.564** | 0.402**         | 0.228           | 0.693**           |
| TSP               |     |         |       |         |         |         |         |         |         |            | 1       | 0.677**         | 0.119           | 0.613**           |
| SO <sub>2</sub>   |     |         |       |         |         |         |         |         |         |            |         | 1               | 0.174           | 0.646**           |
| NO <sub>2</sub>   |     |         |       |         |         |         |         |         |         |            |         |                 | 1               | 0.071             |
| PM <sub>2.5</sub> |     |         |       |         |         |         |         |         |         |            |         |                 |                 | 1                 |

\*\*p&lt;0.01, \*p&lt;0.05

a. Pearson's correlation coefficients.

**Table S2.** Daily air pollutant concentrations correlation matrix for study period 1st April – 31th May 2020, Fukuoka city<sup>a</sup>

|                   | Flt | Pyr     | BaA    | Chr     | BbF     | BkF     | BaP     | BghiP   | IcdP    | Total PAHs | TSP     | SO <sub>2</sub> | NO <sub>2</sub> | PM <sub>2.5</sub> |
|-------------------|-----|---------|--------|---------|---------|---------|---------|---------|---------|------------|---------|-----------------|-----------------|-------------------|
| Flt               | 1   | 0.980** | -0.013 | 0.986** | 0.888** | 0.957** | 0.932** | 0.757** | 0.865** | 0.967**    | 0.368** | -0.021          | 0.393**         | 0.106             |
| Pyr               |     | 1       | 0.129  | 0.971** | 0.912** | 0.956** | 0.940** | 0.787** | 0.855** | 0.979**    | 0.349** | -0.033          | 0.389**         | 0.080             |
| BaA               |     |         | 1      | 0.029   | 0.321*  | 0.132   | 0.135   | 0.197   | 0.053   | 0.176      | -0.150  | -0.025          | -0.231          | -0.153            |
| Chr               |     |         |        | 1       | 0.898** | 0.977** | 0.964** | 0.787** | 0.887** | 0.975**    | 0.334** | -0.047          | 0.393**         | 0.093             |
| BbF               |     |         |        |         | 1       | 0.949** | 0.890** | 0.751** | 0.884** | 0.958**    | 0.356** | -0.058          | 0.400**         | 0.153             |
| BkF               |     |         |        |         |         | 1       | 0.980** | 0.826** | 0.932** | 0.989**    | 0.330** | -0.062          | 0.414**         | 0.138             |
| BaP               |     |         |        |         |         |         | 1       | 0.832** | 0.896** | 0.963**    | 0.271*  | -0.060          | 0.386**         | 0.092             |
| BghiP             |     |         |        |         |         |         |         | 1       | 0.842** | 0.843**    | 0.319*  | -0.046          | 0.288*          | 0.191             |
| IcdP              |     |         |        |         |         |         |         |         | 1       | 0.921**    | 0.393** | -0.066          | 0.457**         | 0.281*            |
| Total PAHs        |     |         |        |         |         |         |         |         |         | 1          | 0.366** | -0.041          | 0.397**         | 0.141             |
| TSP               |     |         |        |         |         |         |         |         |         |            | 1       | 0.156           | 0.354**         | 0.580**           |
| SO <sub>2</sub>   |     |         |        |         |         |         |         |         |         |            |         | 1               | -0.123          | 0.250             |
| NO <sub>2</sub>   |     |         |        |         |         |         |         |         |         |            |         |                 | 1               | 0.256*            |
| PM <sub>2.5</sub> |     |         |        |         |         |         |         |         |         |            |         |                 |                 | 1                 |

\*\*p&lt;0.01, \*p&lt;0.05

a. Pearson's correlation coefficients.

**Table S3. Adjusted estimates of cough symptoms in total PAH exposure in the GEE lag 3 model**

|                                        | Coefficient (B) | 95% CI          | p value      |
|----------------------------------------|-----------------|-----------------|--------------|
| Monitoring site (Kanazawa vs. Fukuoka) | 0.630           | −0.769, 2.030   | 0.377        |
| Sex (men vs. women)                    | −0.614          | −1.584, 0.355   | 0.214        |
| Age, year                              | 0.008           | −0.013, 0.028   | 0.463        |
| Body mass rank                         | −0.383          | −1.133, 0.366   | 0.316        |
| No asthma                              | 0.195           | −0.868, 1.258   | 0.719        |
| Total PAHs, ng/m <sup>3</sup>          | 0.142           | −0.052, 0.336   | 0.152        |
| PM <sub>2.5</sub> , µg/m <sup>3</sup>  | −0.016          | −0.028, −0.004  | <b>0.010</b> |
| SO <sub>2</sub> , ppb                  | 68.054          | 4.556, 131.552  | <b>0.036</b> |
| NO <sub>2</sub> , ppb                  | 6.100           | −13.438, 25.639 | 0.541        |

CI, confidence interval. The p values of <0.05 are highlighted in bold. Adjusted for monitoring sites, sex, age, body mass ranking, asthma, and daily concentrations of PM<sub>2.5</sub>, SO<sub>2</sub> and NO<sub>2</sub>

**Table S4. Adjusted estimates of cough symptoms in total PAH exposure in the GEE lag 4 model**

|                                        | Coefficient (B) | 95% CI           | p value      |
|----------------------------------------|-----------------|------------------|--------------|
| Monitoring site (Kanazawa vs. Fukuoka) | 0.654           | −0.752, 2.060    | 0.362        |
| Sex (men vs. women)                    | −0.597          | −1.561, 0.367    | 0.225        |
| Age, year                              | 0.008           | −0.013, 0.028    | 0.459        |
| Body mass rank                         | −0.379          | −1.125, 0.366    | 0.319        |
| No asthma                              | 0.185           | −0.874, 1.245    | 0.732        |
| Total PAHs, ng/m <sup>3</sup>          | 0.193           | −0.038, 0.424    | 0.101        |
| PM <sub>2.5</sub> , µg/m <sup>3</sup>  | −0.015          | −0.029, −0.001   | <b>0.039</b> |
| SO <sub>2</sub> , ppb                  | 48.165          | −22.173, 118.504 | 0.180        |
| NO <sub>2</sub> , ppb                  | 6.965           | −12.525, 26.454  | 0.484        |

CI, confidence interval. The p values of <0.05 are highlighted in bold. Adjusted for monitoring sites, sex, age, body mass ranking, asthma, and daily concentrations of PM<sub>2.5</sub>, SO<sub>2</sub> and NO<sub>2</sub>
